# Supplementary material for: fNIRS-Based Differences in Cortical Activation during Tool Use, Pantomimed Actions, and Meaningless Actions between Children with and without Autism Spectrum Disorder (ASD)
Source: MDPI journal article supplement (doi:10.3390/brainsci13060876), 2023-05-29
Supplement: s1 [file s1]

# **fNIRS-based Differences in Cortical Activation During Tool-use, Pantomimed Actions, and Meaningless Actions between Children with and without Autism Spectrum Disorder (ASD)**

Wan-Chun Su,<sup>1,2</sup> McKenzie Culotta,<sup>1,2</sup> Jessica Mueller,<sup>3</sup> Daisuke Tsuzuki,<sup>4</sup> Anjana N. Bhat<sup>1,2,5\*</sup>

**Supplementary Table S1.** Spatial registration and assignment for right and left hemisphere channels.

| Side  | Ch | MNI's coordinate system |       |      | MIFG regions           |                      |                  | IPL regions       |                     |               | MSTG regions          |                         | Assigned region |
|-------|----|-------------------------|-------|------|------------------------|----------------------|------------------|-------------------|---------------------|---------------|-----------------------|-------------------------|-----------------|
|       |    | X                       | Y     | Z    | Inferior frontal gyrus | Middle frontal gyrus | Precentral gyrus | Postcentral gyrus | Supramarginal gyrus | Angular gyrus | Middle temporal gyrus | Superior temporal gyrus |                 |
| left  | 1  | -51.3                   | 0.3   | 53.7 |                        | 18.0                 | 81.6             | 0.4               |                     |               |                       |                         | MIFG            |
|       | 2  | -56.7                   | -29.7 | 54.3 |                        |                      |                  | 30.0              | 70.0                |               |                       |                         | IPL             |
|       | 3  | -53.0                   | 17.7  | 39.7 | 0.4                    | 81.4                 | 18.3             |                   |                     |               |                       |                         | MIFG            |
|       | 4  | -62.3                   | -14.7 | 43.7 |                        |                      | 4.2              | 71.0              | 24.7                |               |                       |                         | IPL             |
|       | 5  | -63.0                   | -43.3 | 45.3 |                        |                      |                  |                   | 70.6                | 29.4          |                       |                         | IPL             |
|       | 6  | -63.7                   | 2.7   | 29.3 |                        |                      | 69.2             | 30.8              |                     |               |                       |                         | MIFG            |
|       | 7  | -68.0                   | -28.7 | 32.7 |                        |                      |                  |                   | 98.7                |               |                       | 1.3                     | IPL             |
|       | 8  | -60.0                   | 20.3  | 14.3 | 89.6                   |                      | 10.4             |                   |                     |               |                       |                         | MIFG            |
|       | 9  | -69.0                   | -13.3 | 18.3 |                        |                      |                  | 70.7              | 9.8                 |               |                       | 19.6                    | Excluded*       |
|       | 10 | -68.7                   | -43.7 | 19.3 |                        |                      |                  |                   | 32.8                | 0.6           | 1.3                   | 65.3                    | MSTG            |
|       | 11 | -63.0                   | 0.7   | 0.3  | 1.3                    |                      | 21.2             | 3.6               |                     |               | 2.0                   | 71.9                    | MSTG            |
|       | 12 | -71.0                   | -29.7 | 2.7  |                        |                      |                  |                   |                     |               | 56.0                  | 44.0                    | MSTG            |
| right | 13 | 54.7                    | -32.7 | 58.3 |                        |                      |                  | 8.3               | 83.0                | 8.7           |                       |                         | IPL             |
|       | 14 | 52.3                    | -1.7  | 55.7 |                        | 1.7                  | 60.8             | 37.5              |                     |               |                       |                         | SA              |
|       | 15 | 60.7                    | -48.7 | 48.3 |                        |                      |                  |                   | 15.6                | 84.4          |                       |                         | IPL             |
|       | 16 | 64.0                    | -16.3 | 45.7 |                        |                      |                  | 15.9              | 54.1                |               |                       |                         | IPL             |
|       | 17 | 54.7                    | 15.3  | 40.7 | 2.9                    | 48.9                 | 48.2             |                   |                     |               |                       |                         | MIFG            |
|       | 18 | 70.0                    | -32.3 | 34.3 |                        |                      |                  |                   | 88.2                | 11.8          |                       |                         | IPL             |
|       | 19 | 66.3                    | 0.3   | 31.3 |                        |                      | 63.2             | 35.8              | 1.0                 |               |                       |                         | MIFG            |
|       | 20 | 68.0                    | -49.3 | 20.3 |                        |                      |                  |                   | 3.9                 | 33.1          | 26.9                  | 36.1                    | MSTG            |
|       | 21 | 70.0                    | -17.3 | 18.3 |                        |                      |                  | 33.2              | 20.8                |               | 46.0                  |                         | Excluded*       |
|       | 22 | 63.3                    | 15.7  | 14.3 | 12.3                   |                      | 87.7             |                   |                     |               |                       |                         | MIFG            |
|       | 23 | 73.0                    | -35.3 | 3.3  |                        |                      |                  |                   |                     |               | 66.0                  | 34.0                    | MSTG            |
|       | 24 | 68.3                    | -3.3  | -0.3 |                        |                      |                  | 4.3               |                     |               | 11.6                  | 84.1                    | MSTG            |

**Supplementary Table S2.** The means and SEs of HbO<sub>2</sub> concentration in children with and without ASD during Hammer, Pantomime, and Meaningless conditions.

| Group activation data   | Hammer |       | Pantomime |       | Meaningless |       |
|-------------------------|--------|-------|-----------|-------|-------------|-------|
|                         | Mean   | SE    | Mean      | SE    | Mean        | SE    |
| <b>TD</b>               |        |       |           |       |             |       |
| <i>Left hemisphere</i>  |        |       |           |       |             |       |
| MIFG                    | 0.046  | 0.005 | 0.052     | 0.006 | 0.048       | 0.005 |
| MSTG                    | 0.062  | 0.007 | 0.058     | 0.006 | 0.068       | 0.007 |
| IPL                     | 0.020  | 0.005 | 0.029     | 0.006 | 0.020       | 0.005 |
| <i>Right hemisphere</i> |        |       |           |       |             |       |
| MIFG                    | 0.007  | 0.005 | 0.027     | 0.006 | 0.017       | 0.005 |
| MSTG                    | -0.002 | 0.006 | 0.017     | 0.006 | 0.016       | 0.006 |
| IPL                     | -0.022 | 0.005 | -0.002    | 0.006 | -0.010      | 0.005 |
| <b>ASD</b>              |        |       |           |       |             |       |
| <i>Left hemisphere</i>  |        |       |           |       |             |       |
| MIFG                    | 0.042  | 0.006 | 0.063     | 0.007 | 0.044       | 0.006 |
| MSTG                    | 0.034  | 0.007 | 0.038     | 0.007 | 0.023       | 0.007 |
| IPL                     | 0.025  | 0.005 | 0.027     | 0.005 | 0.021       | 0.005 |
| <i>Right hemisphere</i> |        |       |           |       |             |       |
| MIFG                    | 0.039  | 0.005 | 0.043     | 0.006 | 0.030       | 0.006 |
| MSTG                    | 0.010  | 0.007 | 0.037     | 0.007 | 0.010       | 0.006 |
| IPL                     | 0.007  | 0.007 | 0.025     | 0.006 | 0.015       | 0.007 |

**Supplementary Table S3.** The post-hoc analyses for the Group x Condition x Hemisphere x Region 4-way interaction.

| Comparison                           | Significant <i>p</i> values | Direction of effect   |
|--------------------------------------|-----------------------------|-----------------------|
| <b>Group related difference</b>      |                             |                       |
| Hammer condition                     |                             |                       |
| Left MSTG                            | 0.006                       | TD > ASD <sup>a</sup> |
| Right MIFG                           | 0.000                       | ASD > TD <sup>a</sup> |
| Right IPL                            | 0.001                       | ASD > TD <sup>a</sup> |
| Pantomime condition                  |                             |                       |
| Left MSTG                            | 0.031                       | TD > ASD <sup>b</sup> |
| Right MSTG                           | 0.029                       | ASD > TD <sup>b</sup> |
| Right IPL                            | 0.002                       | ASD > TD <sup>a</sup> |
| Body on Object condition             |                             |                       |
| Left MSTG                            | <0.001                      | TD > ASD <sup>a</sup> |
| Right IPL                            | 0.004                       | ASD > TD <sup>a</sup> |
| <b>Condition related difference</b>  |                             |                       |
| TD group                             |                             |                       |
| Right MIFG                           | <0.001                      | P > H <sup>a</sup>    |
|                                      | 0.029                       | P > B <sup>b</sup>    |
| Right MSTG                           | 0.001                       | P > H <sup>a</sup>    |
|                                      | 0.003                       | B > H <sup>a</sup>    |
| Right IPL                            | 0.001                       | P > H <sup>a</sup>    |
|                                      | 0.037                       | B > H <sup>b</sup>    |
| ASD group                            |                             |                       |
| Left MIFG                            | 0.016                       | P > H <sup>b</sup>    |
| Right MIFG                           | 0.017                       | P > B <sup>b</sup>    |
| Right MSTG                           | 0.003                       | P > H <sup>a</sup>    |
|                                      | 0.001                       | P > B <sup>a</sup>    |
| Right IPL                            | 0.047                       | P > H <sup>b</sup>    |
| <b>Hemisphere related difference</b> |                             |                       |
| TD group                             |                             |                       |
| Hammer, MIFG                         | <0.001                      | L > R <sup>a</sup>    |
| Hammer, MSTG                         | <0.001                      | L > R <sup>a</sup>    |
| Hammer, IPL                          | <0.001                      | L > R <sup>a</sup>    |
| Pantomime, MIFG                      | <0.001                      | L > R <sup>a</sup>    |
| Pantomime, MSTG                      | <0.001                      | L > R <sup>a</sup>    |
| Pantomime, IPL                       | <0.001                      | L > R <sup>a</sup>    |
| Body on Object, MIFG                 | <0.001                      | L > R <sup>a</sup>    |
| Body on Object, MSTG                 | <0.001                      | L > R <sup>a</sup>    |
| Body on Object, IPL                  | <0.001                      | L > R <sup>a</sup>    |
| ASD group                            |                             |                       |
| Hammer, MSTG                         | 0.002                       | L > R <sup>a</sup>    |
| Hammer, IPL                          | 0.008                       | L > R <sup>a</sup>    |
| Pantomime, MIFG                      | 0.003                       | L > R <sup>a</sup>    |
| Body on Object, MIFG                 | 0.015                       | L > R <sup>a</sup>    |

a. The *p* values survived the FDR correction

b. The *p* values < 0.05, but not survived the FDR correction

**Supplementary Table S4.** Correlations between cortical activation and VABS scores.

| r-values                       | VABS-Communication |                |        | VABS-Daily Living |                |                | VABS-Socialization |                |                | VABS-Total     |                |                |
|--------------------------------|--------------------|----------------|--------|-------------------|----------------|----------------|--------------------|----------------|----------------|----------------|----------------|----------------|
|                                | H                  | P              | M      | H                 | P              | M              | H                  | P              | M              | H              | P              | M              |
| <b>TD Children without ASD</b> |                    |                |        |                   |                |                |                    |                |                |                |                |                |
| <i>Left hemisphere</i>         |                    |                |        |                   |                |                |                    |                |                |                |                |                |
| MIFG                           | -0.200*            | -0.029         | 0.095  | -0.014            | 0.103          | 0.096          | 0.029              | 0.063          | -0.066         | 0.007          | 0.123          | 0.083          |
| MSTG                           | <i>0.170</i>       | -0.209*        | 0.132  | -0.013            | -0.063         | -0.187*        | <i>-0.185</i>      | 0.084          | -0.237*        | -0.030         | -0.013         | -0.180         |
| IPL                            | 0.120              | <b>0.266**</b> | 0.097  | 0.113             | <b>0.250**</b> | 0.144          | <i>-0.172</i>      | -0.140         | -0.111         | 0.018          | 0.146          | 0.069          |
| <i>Right hemisphere</i>        |                    |                |        |                   |                |                |                    |                |                |                |                |                |
| MIFG                           | 0.059              | 0.096          | 0.240* | 0.120             | 0.130          | <b>0.266**</b> | <b>0.493**</b>     | <b>0.283**</b> | <b>0.392**</b> | <b>0.333**</b> | <b>0.254**</b> | <b>0.420**</b> |
| MSTG                           | 0.043              | 0.145          | 0.104  | -0.039            | -0.001         | -0.179         | <b>0.244**</b>     | 0.138          | <i>0.166</i>   | 0.129          | 0.115          | 0.035          |
| IPL                            | <b>-0.251**</b>    | -0.001         | 0.124  | -0.215*           | -0.057         | 0.037          | <b>0.277**</b>     | <i>0.161</i>   | 0.209*         | -0.029         | 0.065          | 0.151          |
| <b>Children with ASD</b>       |                    |                |        |                   |                |                |                    |                |                |                |                |                |
| <i>Left Hemisphere</i>         |                    |                |        |                   |                |                |                    |                |                |                |                |                |
| MIFG                           | 0.133              | -0.054         | 0.162  | 0.079             | -0.147         | -0.022         | -0.058             | -0.108         | -0.121         | 0.049          | 0.125          | -0.003         |
| MSTG                           | 0.253*             | <i>-0.195</i>  | -0.173 | <i>0.210</i>      | -0.104         | -0.041         | 0.177              | -0.220*        | -0.096         | 0.229*         | -0.169         | -0.095         |
| IPL                            | -0.135             | -0.219*        | -0.125 | <i>-0.210</i>     | -0.170         | -0.108         | <b>-0.341**</b>    | 0.011          | -0.045         | -0.245*        | -0.133         | -0.090         |
| <i>Right Hemisphere</i>        |                    |                |        |                   |                |                |                    |                |                |                |                |                |
| MIFG                           | 0.257*             | -0.111         | 0.072  | 0.171             | -0.141         | -0.036         | 0.047              | -0.267*        | -0.247*        | 0.170          | -0.184         | -0.075         |
| MSTG                           | <b>0.337**</b>     | -0.012         | 0.104  | <i>0.196</i>      | -0.072         | 0.089          | -0.001             | -0.263*        | -0.190         | 0.180          | -0.127         | 0.007          |
| IPL                            | -0.059             | 0.247*         | 0.017  | 0.021             | <i>-0.185</i>  | 0.022          | -0.016             | <i>-0.185</i>  | 0.037          | -0.011         | -0.213*        | 0.040          |

r values are presented in this figure. \*indicates  $p < 0.05$ ; \*\* indicates  $p < 0.01$ . Bolded font with shading indicates  $p$  values that survived FDR corrections. Italic font indicates  $p$  values between 0.05 and 0.1. H = hammer condition; P = Pantomime condition; M = Meaningless condition. Blue highlighting shows the ROIs associated with tool use for children with and without ASD given the multiple correlations observed between VABS scores and activation data.

## **Abbreviations**

ASD, autism spectrum disorder; IPL, inferior parietal lobe; STS, superior temporal sulcus; MTG, middle temporal gyrus; IFG, inferior frontal gyrus; fMRI, functional Magnetic Resonance Imaging; TD, typically developing; EEG, electroencephalogram; ERD, event related desynchronization; fNIRS, functional near infra-red spectroscopy; SIPT-PP, Sensory Integration & Praxis Test, postural praxis; SIPT-BMC, Sensory Integration & Praxis Test, bimanual coordination subtests; IQ, Intelligence Quotient; BOT-2, Bruininks-Oseretsky Test of Motor Proficiency; HbO<sub>2</sub>, Oxygenated Hemoglobin; SE, Standard Error; MSTG, Middle and Superior Temporal gyri; MIFG, Middle and Inferior Frontal Gyri; ADOS, Autism Diagnostic Observation Schedule, Social Affect; ADOS-RRB, Autism Diagnostic Observation Schedule, Repetitive Behaviors; ROI, Region of Interest; SES-Child = Hollingshead Four-Factor Index of Socioeconomic Status; SCQ = Social Communication Questionnaire; VABS-II = Vineland Adaptive Behavior Scale - 2nd Edition; M = Male, F = Female; C = Caucasian, A = Asian, BC= Black-Caucasian, AC = Asian-Caucasian, AI = American Indian. R = right, L = left; MNI, Montreal Neurological Institute; LPBA, LONI Probabilistic Brain Atlas; FDR, False Discovery Rate.
